# Supplementary material for: Early Glycemic Response Predicts Achievement of Subsequent Treatment Targets in the Treatment of Type 2 Diabetes: A Post hoc Analysis
Source: PubMed Central journal article supplement — Diabetes Ther. 2015 Jul 5;6(3):317–28. doi: 10.1007/s13300-015-0119-x (PMC4575302; doi:10.1007/s13300-015-0119-x), 2015-07-05
Supplement: 13300_2015_119_MOESM1_ESM.pdf [file 13300_2015_119_MOESM1_ESM.pdf]

## Early Glycemic Response Predicts Achievement of Subsequent Treatment Targets in the Treatment of Type 2 Diabetes: A Post Hoc Analysis

Fu H et al. Diabetes Ther. 2015.

This slide deck represents the opinions of the authors. Sponsorship for this study was funded by Eli Lilly and Company. Medical writing assistance for this study was provided by INC Research (*Joseph Giaconia*). For a full list of acknowledgments and conflicts of interest for all authors of this article, please see the full text online. Copyright © The Authors 2015. Creative Commons Attribution Noncommercial License (CC BY-NC).

## Abbreviations

|                   |                                |
|-------------------|--------------------------------|
| ADA               | =American Diabetes Association |
| FBG               | =Fasting Blood Glucose         |
| GBM               | =Gradient Boosting Method      |
| HbA <sub>1c</sub> | =Glycated Hemoglobin           |
| NPV               | =Negative Predictive Value     |
| PPV               | =Positive Predictive Value     |
| T2DM              | =Type 2 Diabetes Mellitus      |
| Met               | =Metformin                     |
| SU                | =Sulfonylurea                  |
| Glargine          | =Insulin Glargine              |

## Introduction

- ADA consensus guidelines emphasize individualized treatment in the management of T2DM.
- Early glycemic response is a clinical marker that may predict longer-term efficacy for individual patients and provide a clinical tool to enhance personalized treatment.
- This analysis assessed the predictive power of early response for subsequent response across 3 commonly prescribed glucose-lowering medications: metformin, sulfonylurea, and insulin glargine.
- We hypothesized that glycemic response at week 12 (early response) predicts subsequent glycemic responses at week 24 (the primary outcome) and week 52 (the secondary outcome) in the treatment of patients with T2DM.

## Methods

- Three previously published randomized clinical trials that included large sample sizes and individual patient data were used for this study.
- Metformin data ( $n=597$ ) [1], sulfonylurea data ( $n=626$ ) [2], insulin glargine data ( $n=1046$ ) [3].
- The GBM was used to identify predictors of subsequent response; predictive accuracy was represented by sensitivity, specificity, PPV, and NPV.
- Treatment success at weeks 24 and 52 was assessed for each patient and defined as achieving an HbA<sub>1c</sub> level of <7.0% or a reduction from baseline of  $\geq 1.0\%$ .

[1]Schernthaner G, Matthews DR, Charbonnel B, et al. J Clin Endocrinol Metab. 2004;89:6068-76.

[2]Charbonnel BH, Matthews DR, Schernthaner G, et al. Diabet Med. 2004;22:399-405.

[3]Buse JB, Wolffenbuttel BH, Herman WH, et al. Diabetes Care. 2011;34:249-55. doi: 10.2337/dc10-1701.

## Results

- For each medication, the optimal early response variable was equal or close to a reduction in HbA<sub>1c</sub> level of  $\geq 1.0\%$ , which is considered to be clinically meaningful. Therefore, we chose a single, unified early-response measure (a reduction in HbA<sub>1c</sub> level of  $\geq 1.0\%$ ) for all 3 medications.
- The GBM did not select an HbA<sub>1c</sub> level of  $< 7.0\%$  as an optimal early-response variable in any case. However, since an HbA<sub>1c</sub> level of  $< 7.0\%$  is clinically meaningful, it was combined with a reduction in HbA<sub>1c</sub> of  $\geq 1.0\%$  for a composite unified measure in assessing predictive parameters.

## Results

- The predictive parameters for improvements in HbA<sub>1c</sub> at week 24 and week 52, based on the composite unified early-response measure can be seen in Table 1.

Table 1-Predictive parameters for improvements in HbA<sub>1c</sub> at 24 and 52 weeks based on HbA<sub>1c</sub> levels at 12 weeks.

| Early Response Measure | Subsequent Response | Agent    | Sensitivity | Specificity | PPV  | NPV  |
|------------------------|---------------------|----------|-------------|-------------|------|------|
| Composite unified      | 24 weeks            | Met      | 0.83        | 0.81        | 0.44 | 0.96 |
|                        |                     | SU       | 0.79        | 0.94        | 0.71 | 0.96 |
|                        |                     | Glargine | 0.67        | 0.89        | 0.65 | 0.90 |
|                        | 52 weeks            | Met      | 0.73        | 0.84        | 0.56 | 0.92 |
|                        |                     | SU       | 0.45        | 0.94        | 0.74 | 0.82 |
|                        |                     | Glargine | 0.74        | 0.83        | 0.56 | 0.92 |
| Unified                | 24 weeks            | Met      | 0.90        | 0.74        | 0.38 | 0.98 |
|                        |                     | SU       | 0.85        | 0.88        | 0.57 | 0.97 |
|                        |                     | Glargine | 0.74        | 0.83        | 0.56 | 0.92 |
|                        | 52 weeks            | Met      | 0.82        | 0.78        | 0.50 | 0.94 |
|                        |                     | SU       | 0.52        | 0.88        | 0.62 | 0.83 |
|                        |                     | Glargine | 0.74        | 0.83        | 0.56 | 0.92 |
| Optimal                | 24 weeks            | Met      | 0.82        | 0.81        | 0.44 | 0.96 |
|                        |                     | SU       | 0.85        | 0.88        | 0.57 | 0.97 |
|                        |                     | Glargine | 0.74        | 0.83        | 0.56 | 0.92 |
|                        | 52 weeks            | Met      | 0.56        | 0.92        | 0.67 | 0.88 |
|                        |                     | SU       | 0.52        | 0.88        | 0.62 | 0.83 |
|                        |                     | Glargine | 0.74        | 0.83        | 0.56 | 0.92 |

- The predictive parameters assessed by using the optimal early-response measure and the unified measure were consistent with those of the composite unified measure and are shown in Table 1. Across all therapies and early-response measures and at both time points, the NPV remained consistently high (range, 0.82-0.98) (Table 1).

## Conclusion

- The high predictive values identified in this analysis support our hypothesis that lack of early glycemic response is a reliable clinical marker for identifying a lack of treatment success at 24 and 52 weeks.
- The high NPV (lack of early glycemic response) appears to be an effective indicator of the likely need for a change in (or intensification of) therapy and could become valuable in clinical practice.
- The study findings support the current treatment recommendations for T2DM, which advise clinicians to evaluate therapeutic response to pharmacologic interventions with metformin, sulfonylureas, or insulin glargine as early as 12 weeks.

## Acknowledgments

- This study and article processing charges were funded by Eli Lilly and Company (Indianapolis, IN, USA). The authors thank Joseph Giaconia (INC Research, Raleigh, NC, USA) for his medical writing assistance in the preparation of this manuscript; support for his assistance was funded by Eli Lilly and Company. All authors had full access to all of the data in this study and take complete responsibility for the integrity of the data and accuracy of the data analysis.
- All named authors meet the ICMJE criteria for authorship for this manuscript, take responsibility for the integrity of the work as a whole, and have given final approval to the version to be published.



## Copyright

Copyright © The Authors 2015.

This slide deck is distributed under the terms of the Creative Commons Attribution Noncommercial License which permits any noncommercial use, distribution, and reproduction in any medium, provided the original author(s) and the source are credited.
