# Supplementary material for: Early Glycemic Response Predicts Achievement of Subsequent Treatment Targets in the Treatment of Type 2 Diabetes: A Post hoc Analysis
Source: PubMed Central journal article supplement — Diabetes Ther. 2015 Jul 5;6(3):317–28. doi: 10.1007/s13300-015-0119-x (PMC4575302; doi:10.1007/s13300-015-0119-x), 2015-07-05
Supplement: 13300_2015_119_MOESM2_ESM.pdf [file 13300_2015_119_MOESM2_ESM.pdf]

- The current study assessed the accuracy of early glycemic response at week 12 as a predictor of subsequent treatment success in patients with type 2 diabetes mellitus (T2DM).
- Data from 3 randomized, controlled clinical trials that evaluated patients treated with 3 common drug therapies for T2DM, were assessed by using the gradient boosting method.
- A *composite unified* early-response measure (reduction in glycated hemoglobin (HbA<sub>1c</sub>) level of  $\geq 1.0\%$  or HbA<sub>1c</sub> level of  $< 7.0\%$ ) is recommended as an effective predictor for subsequent treatment success.
- Predictive values for improvements in HbA<sub>1c</sub> at week 24 were 0.67-0.83 (sensitivity), 0.81-0.94 (specificity), 0.44-0.71 (positive predictive value, and 0.90-0.96 (negative predictive value [NPV]).
- The high NPV (lack of early glycemic response) appears to be an excellent indicator of the likely need for a change in (or intensification of) therapy.

This summary slide represents the opinions of the authors. Sponsorship for this study was funded by Eli Lilly and Company. Medical writing assistance for this study was provided by Joseph Giaconia (INC Research, Raleigh, NC, USA). For a full list of acknowledgments and conflicts of interest for all authors of this article, please see the full text online. Copyright © The Authors 2015. Creative Commons Attribution Noncommercial License (CC BY-NC).
